# Supplementary material for: Investigation of an Acute Fasciolosis Complicated by Clostridia Infection Outbreak in Korem Town, Southern Tigray of Ethiopia
Source: Research Square preprint supplement (doi:10.21203/rs.3.rs-557724/v1), 2021-06-18
Supplement: Supplementary file 1 [file 1bdcd4e05753c4a0aabb432f.docx]

Annex **II. Questionnaire for animal health technicians on data associated with the outbreak**

1. General information

- Date of interview……………………….
- Zone___________ district___________ Village___________
- Altitude of the area (M.a.s.l) a) high altitude (>2000) b) mid altitude (1500-1800) c) Low altitude (<1500)

1. Educational status A) diploma b) degree c) Masters e) other
   1. Sex a) male b) female
   2. Age ………………
2. What is the agricultural production system of the village? a)livestock b)mixed crop- livestock
3. How and when you heard about theoutbreak ____________________________________
4. Would you tell as your annual vaccination schedules specifically in the area where the outbreak was occurred?
5. **Description of event**

Please, tell us what is happening briefly about the outbreak _____________________________________________________________________________________________________________________________________________________________________________________________________________________________________________________________________________________________________________________________________________________________________________________________________________________________________________________________________________________________________

1. GEOGRAPHIC LOCATION
   1. Where is the outbreak occurred? _____________________________
   2. Is there anything new/peculiar you observe or you think in the place were outbreak was occurred (like; location/ grazing system/ other) from other place?
   3. What do you think the source exposure for this outbreak __________________________________________________________________________________________________________________________________________
   4. Dose this exposure occurred in single please? a) Yes b) no
   5. If no, where such like exposure were occurred­­­__________________ and have you observe similar cases in this please___________________
   6. Have you observe similar cases like this where this exposure were not occurred________
   7. please tell as City/Town/Place of Exposure occurred : ___________________________
2. **Dates (dd / mm/yyyy)**
   1. when do you think date of initial exposure: ___/___/_____
   2. when you observe first case: ___/___/_____
   3. Is there stile case a). Yes b). no
3. CASES
   1. Which animal species where affected by the outbreak_____________________________________________________
   2. Number of animal visited health care provider______
   3. What is your tentative diagnosis about the outbreak ___________________
   4. Treatment out come a) recovered b) died; If died, date of death ___________________________________________________________
   5. Type of medication given _______________________________
   6. Is the suspected exposure still occurring? Yes / No
4. LABORATORY
   1. Is the etiology known? a). Yes b). no
   2. If on, were samples collected? a). Yes b). no
   3. If samples were collected, how many samples collected? And what types of samples are collected?
   4. What were they tested for?
5. INCUBATION PERIOD

a). Min, ……..Hours, …….Days………..

b). Unknown incubation period………….

1. DURATION OF ILLNESS

a). Min. _____________Hours. _____________Days____________________

b). Unknown duration of illness……

1. Could you mention the observed signs or symptoms ______________________________________________________________________________________________________________________________________________________________________________________________________________________________________________________________________________________________________________________________________________________________
2. How the disease is transmitted

a). Food

b). Water

c). Animal contact

d). Environmental contamination

e). Indeterminate

f). Other ________________________________________________________________________________________________________________________________________

15. Anything you went to add, not reside in the questionnaire?
