# Supplementary material for: Investigation of an Acute Fasciolosis Complicated by Clostridia Infection Outbreak in Korem Town, Southern Tigray of Ethiopia
Source: Research Square preprint supplement (doi:10.21203/rs.3.rs-557724/v1), 2021-06-18
Supplement: Supplementary file 2 [file 26cc9c4f56993d9c68213acd.docx]

Annex **I. Questionnaire for animal owners on data associated with the outbreak**

1. General information

- Date of interview……………………….
- Zone___________ district___________ Village___________
- Altitude of the area (M.a.s.l) a) high altitude (>2000) b) mid altitude (1500-1800) c) Low altitude (<1500)

1. *Household characteristics*
   1. Name of the household head/respondent……………
   2. Sex of house hold head a) male b) female
   3. Age of house hold head………………
   4. Marital status a) married b) single c)Widow d)Divorced
   5. Family size: Male……. Female………. Total…………
   6. System of Agricultural production a)livestock b)mixed crop- livestock
2. Feeding, watering and health management
   1. Mode of feeding a) free grazing b) stall feeding c) partial grazing; If free grazing, time (hr) of grazing_______________________________________
   2. Watering a) free access b) periodic
   3. Source of water a) tap water b) river c) open well d) other ________________________________________________________________
   4. Do you have an access to veterinary service? a) yes b) no
   5. Do you have schedule for deworming? a) yes b) no
   6. Is there a vaccination program in you village in this yea? a) Yes b) no; if yes would you remember type of vaccine given?
3. **Description of event**

Please, tell us what is happening briefly _____________________________________________________________________________________________________________________________________________________________________________________________________________________________________________________________________________________________________________________________________________________________________________________________________________________________________________________________________________________________________

1. GEOGRAPHIC LOCATION
   1. Where is the outbreak occurred? _____________________________
   2. Is there anything new/peculiar you observe or you think in the place were outbreak was occurred (like; location/ grazing system/ other) from other place?
   3. What do you think the source exposure for this outbreak __________________________________________________________________________________________________________________________________________
   4. Dose this exposure occurred in single please? a) Yes b) no
   5. If no, where such like exposure were occurred­­­__________________ and have you observe similar cases in this please___________________
   6. Have you observe similar cases like this where this exposure were not occurred________
   7. please tell as City/Town/Place of Exposure occurred : ___________________________
2. **Dates (dd / mm/yyyy)**
   1. Date of initial exposure: ___/___/_____
   2. Date first case became ill: ___/___/_____
   3. Date of last exposure: ___/___/_____
   4. Date last case became ill: ___/___/_____
3. CASES
   1. How many livestock you have_____________________________
   2. Which animal species where affected by the outbreak_____________________________________________________
   3. Total number of animals which can affected by the outbreak you holed ( total animal at risk); _______________________________________
   4. Do you have confirmed cases of this outbreak; Yes / No ; if yes how many _________
   5. Do you have Probable cases of this outbreak; Yes / No ; if yes how many _________
   6. Number of died; ; ______________________________________
   7. Estimated % of the cases by sex; Male_____________ Female___________
   8. Estimated % of the cases by age; __________________
   9. Estimated % of the cases by physiological states; pregnant ______ lactating ______ nether lactating nor pregnant______
   10. Number of animal visited health care provider______
   11. Treatment out come a) recovered b) died; If died, date of death ___________________________________________________________
   12. Type of medication given _______________________________
   13. Is the suspected exposure still occurring? Yes / No
4. INCUBATION PERIOD

a). Min, ……..Hours, …….Days………..

b). Unknown incubation period………….

1. DURATION OF ILLNESS

a). Min. _____________Hours. _____________Days____________________

b). Unknown duration of illness……

1. Could you mention the observed signs or symptoms ______________________________________________________________________________________________________________________________________________________________________________________________________________________________________________________________________________________________________________________________________________________________
2. How the disease is transmitted

a). Food

b). Water

c). Animal contact

d). Environmental contamination

e). Indeterminate

f). Other ________________________________________________________________________________________________________________________________________
